# Supplementary material for: Persistence of Multiple Paramyxoviruses in a Closed Captive Colony of Fruit Bats (<em>Eidolon helvum</em>)
Source: Preprints.org preprint supplement (doi:10.20944/preprints202107.0461.v1), 2021-07-20
Supplement: Supplementary file 2 [file supplementary]

**SUPPLEMENTARY MATERIAL**

**Table S1. Top BLAST results from submission of the consensus sequence of the L gene.** Abbreviations: P = 530 bp fragment obtained with the pan-*Paramyxovirus* RT-PCR, R = 439 bp fragment obtained with the *Respiro-Morbilli-Henipavirus* RT-PCR.

| Sequence Name | Number of detections | GenBank BLAST ID | GenBank Accession | Nucleotide identity (%) |
| --- | --- | --- | --- | --- |
| Z15-U17P | 1 | [Bat Paramyxovirus Eid_hel/ZFB09-07/Zambia/2009 L gene for RNA polymerase, partial cds](https://blast.ncbi.nlm.nih.gov/Blast.cgi#alnHdr_584592931) | [AB853094.1](https://www.ncbi.nlm.nih.gov/nucleotide/AB853094.1?report=genbank&log$=nucltop&blast_rank=1&RID=PVK1YG4P014) | 99.25 |
| Z15-U27P | 15 | [Eidolon helvum paramyxovirus clone U68G large protein (L) gene, partial cds](https://blast.ncbi.nlm.nih.gov/Blast.cgi#alnHdr_373427840) | [JN648082.1](https://www.ncbi.nlm.nih.gov/nucleotide/JN648082.1?report=genbank&log$=nucltop&blast_rank=1&RID=PVJHYCGB016) | 96.98 |
| [Eidolon helvum paramyxovirus clone U64A large protein (L) gene, partial cds](https://blast.ncbi.nlm.nih.gov/Blast.cgi#alnHdr_373427830) | [JN648077.1](https://www.ncbi.nlm.nih.gov/nucleotide/JN648077.1?report=genbank&log$=nucltop&blast_rank=2&RID=PVJHYCGB016) | 96.79 |
| Z15-U111P | 1 | [Eidolon helvum paramyxovirus clone U69D large protein (L) gene, partial cds](https://blast.ncbi.nlm.nih.gov/Blast.cgi#alnHdr_373427844) | [JN648084.1](https://www.ncbi.nlm.nih.gov/nucleotide/JN648084.1?report=genbank&log$=nucltop&blast_rank=1&RID=PVJS3NYN014) | 98.87 |
| [Eidolon helvum paramyxovirus clone U69C large protein (L) gene, partial cds](https://blast.ncbi.nlm.nih.gov/Blast.cgi#alnHdr_373427842) | [JN648083.1](https://www.ncbi.nlm.nih.gov/nucleotide/JN648083.1?report=genbank&log$=nucltop&blast_rank=2&RID=PVJS3NYN014) | 98.68 |
| Z15-U12R | 31 | [Paramyxovirus bat/GH27a/2009 polymerase (L) gene, partial cds](https://blast.ncbi.nlm.nih.gov/Blast.cgi#alnHdr_285013181) | [FJ971940.1](https://www.ncbi.nlm.nih.gov/nucleotide/FJ971940.1?report=genbank&log$=nucltop&blast_rank=1&RID=PVKF54P5016) | 98.63 |
| [Eidolon helvum paramyxovirus clone U61A polymerase (L) gene, partial cds](https://blast.ncbi.nlm.nih.gov/Blast.cgi#alnHdr_373427888) | [JN862578.1](https://www.ncbi.nlm.nih.gov/nucleotide/JN862578.1?report=genbank&log$=nucltop&blast_rank=2&RID=PVKF54P5016) | 98.38 |
| Z15-U17R | 3 | [Bat Paramyxovirus Eid_hel/GB1678/GAB/2005 isolate BatPV/Eid_hel/GB1678/GAB/2005 RNA-dependent RNA polymerase (L) gene, partial cds](https://blast.ncbi.nlm.nih.gov/Blast.cgi#alnHdr_356968545) | [HQ660144.1](https://www.ncbi.nlm.nih.gov/nucleotide/HQ660144.1?report=genbank&log$=nucltop&blast_rank=1&RID=PVK6GKXR01R) | 99.54 |
| [Bat Paramyxovirus Eid_hel/GB1535/GAB/2005 isolate BatPV/Eid_hel/GB1535/GAB/2005 RNA-dependent RNA polymerase (L) gene, partial cds](https://blast.ncbi.nlm.nih.gov/Blast.cgi#alnHdr_356968539) | [HQ660141.1](https://www.ncbi.nlm.nih.gov/nucleotide/HQ660141.1?report=genbank&log$=nucltop&blast_rank=2&RID=PVK6GKXR01R) | 99.08 |
| Z15_U27R | 11 | [Eidolon helvum paramyxovirus clone U51B polymerase (L) gene, partial cds](https://blast.ncbi.nlm.nih.gov/Blast.cgi#alnHdr_373427878) | [JN862573.1](https://www.ncbi.nlm.nih.gov/nucleotide/JN862573.1?report=genbank&log$=nucltop&blast_rank=1&RID=PVKR3K88014) | 99.54 |
| [Eidolon helvum paramyxovirus clone U51A polymerase (L) gene, partial cds](https://blast.ncbi.nlm.nih.gov/Blast.cgi#alnHdr_373427860) | [JN862564.1](https://www.ncbi.nlm.nih.gov/nucleotide/JN862564.1?report=genbank&log$=nucltop&blast_rank=2&RID=PVKR3K88014) | 99.09 |
| [Eidolon helvum paramyxovirus clone U50B polymerase (L) gene, partial cds](https://blast.ncbi.nlm.nih.gov/Blast.cgi#alnHdr_373427892) | [JN862580.1](https://www.ncbi.nlm.nih.gov/nucleotide/JN862580.1?report=genbank&log$=nucltop&blast_rank=3&RID=PVKR3K88014) | 98.18 |
| [Eidolon helvum paramyxovirus clone U63A polymerase (L) gene, partial cds](https://blast.ncbi.nlm.nih.gov/Blast.cgi#alnHdr_373427880) | [JN862574.1](https://www.ncbi.nlm.nih.gov/nucleotide/JN862574.1?report=genbank&log$=nucltop&blast_rank=4&RID=PVKR3K88014) | 98.18 |
| [Eidolon helvum paramyxovirus clone U64A polymerase (L) gene, partial cds](https://blast.ncbi.nlm.nih.gov/Blast.cgi#alnHdr_373427882) | [JN862575.1](https://www.ncbi.nlm.nih.gov/nucleotide/JN862575.1?report=genbank&log$=nucltop&blast_rank=5&RID=PVKR3K88014) | 97.72 |
| [Eidolon helvum paramyxovirus clone U49B polymerase (L) gene, partial cds](https://blast.ncbi.nlm.nih.gov/Blast.cgi#alnHdr_373427876) | [JN862572.1](https://www.ncbi.nlm.nih.gov/nucleotide/JN862572.1?report=genbank&log$=nucltop&blast_rank=6&RID=PVKR3K88014) | 97.72 |
| Z15-U78R | 13 | [Bat paramyxovirus Eid.hel/GH45/2008 polymerase (L) gene, partial cds](https://blast.ncbi.nlm.nih.gov/Blast.cgi#alnHdr_255762020) | [GQ168929.1](https://www.ncbi.nlm.nih.gov/nucleotide/GQ168929.1?report=genbank&log$=nucltop&blast_rank=1&RID=PVKJ7B9J014) | 99.09 |
| [Bat Paramyxovirus Eid_hel/GH-M61a/GHA/2009 isolate BatPV/Eid_hel/GH-M61a/GHA/2009 RNA-dependent RNA polymerase (L) gene, partial cds](https://blast.ncbi.nlm.nih.gov/Blast.cgi#alnHdr_356968523) | [HQ660133.1](https://www.ncbi.nlm.nih.gov/nucleotide/HQ660133.1?report=genbank&log$=nucltop&blast_rank=2&RID=PVKJ7B9J014) | 95.67 |
| [Eidolon paramyxovirus RC09 partial L gene for RNA-dependent RNA polymerase, isolate EPMV_RC09_214s](https://blast.ncbi.nlm.nih.gov/Blast.cgi#alnHdr_393405323) | [HE647822.1](https://www.ncbi.nlm.nih.gov/nucleotide/HE647822.1?report=genbank&log$=nucltop&blast_rank=3&RID=PVKJ7B9J014) | 94.99 |
| Z15-U86R | 10 | [Eidolon helvum paramyxovirus clone U54B polymerase (L) gene, partial cds](https://blast.ncbi.nlm.nih.gov/Blast.cgi#alnHdr_373427874) | [JN862571.1](https://www.ncbi.nlm.nih.gov/nucleotide/JN862571.1?report=genbank&log$=nucltop&blast_rank=1&RID=PVKZ8MP301R) | 97.72 |
| [Eidolon paramyxovirus RC09 partial L gene for RNA-dependent RNA polymerase, isolate EPMV_RC09_222k](https://blast.ncbi.nlm.nih.gov/Blast.cgi#alnHdr_393405329) | [HE647825.1](https://www.ncbi.nlm.nih.gov/nucleotide/HE647825.1?report=genbank&log$=nucltop&blast_rank=2&RID=PVKZ8MP301R) | 97.49 |
| [Eidolon helvum paramyxovirus clone U54A polymerase (L) gene, partial cds](https://blast.ncbi.nlm.nih.gov/Blast.cgi#alnHdr_373427858) | [JN862563.1](https://www.ncbi.nlm.nih.gov/nucleotide/JN862563.1?report=genbank&log$=nucltop&blast_rank=3&RID=PVKZ8MP301R) | 97.49 |
| [Eidolon helvum paramyxovirus clone U59B polymerase (L) gene, partial cds](https://blast.ncbi.nlm.nih.gov/Blast.cgi#alnHdr_373427890) | [JN862579.1](https://www.ncbi.nlm.nih.gov/nucleotide/JN862579.1?report=genbank&log$=nucltop&blast_rank=4&RID=PVKZ8MP301R) | 97.27 |
| Z15-U115R | 1 | [Eidolon helvum paramyxovirus clone U58B polymerase (L) gene, partial cds](https://blast.ncbi.nlm.nih.gov/Blast.cgi#alnHdr_373427898) | [JN862583.1](https://www.ncbi.nlm.nih.gov/nucleotide/JN862583.1?report=genbank&log$=nucltop&blast_rank=1&RID=PVM407A5014) | 76.26 |
| [Eidolon helvum paramyxovirus clone U32A polymerase (L) gene, partial cds](https://blast.ncbi.nlm.nih.gov/Blast.cgi#alnHdr_373427920) | [JN862594.1](https://www.ncbi.nlm.nih.gov/nucleotide/JN862594.1?report=genbank&log$=nucltop&blast_rank=2&RID=PVM407A5014) | 75.8 |

**Table S2. Information of the virus sequences used for phylogenetic analyses downloaded from GenBank (NCBI).**

| Abbreviated as displayed on tree | GenBank Accession | GenBank ID |
| --- | --- | --- |
| Measles virus | AB016162.1 | Measles virus genomic RNA, complete sequence |
| BatPV Eid hel ZFB09 07 Zambia | AB853094.1 | Bat Paramyxovirus Eid_hel/ZFB09-07/Zambia/2009 L gene for RNA polymerase, partial cds |
| Canine distemper virus | AF014953.1 | Canine distemper virus, complete genome |
| Hendra virus | AF017149.3 | Hendra virus, complete genome |
| Tupaia paramyxovirus | AF079780.2 | Tupaia paramyxovirus, complete genome |
| Newcastle disease virus | AY845400.2 | Newcastle disease virus strain LaSota, complete genome |
| J-virus | AY900001.1 | J-virus, complete genome |
| Nipah virus Bangladesh | AY988601.1 | Nipah virus from Bangladesh, complete genome |
| BatPV GH27a Ghana | FJ971940.1 | Paramyxovirus bat/GH27a/2009 polymerase (L) gene, partial cds |
| BatPV Eid hel GH45 | GQ168929.1 | Bat paramyxovirus Eid.hel/GH45/2008 polymerase (L) gene, partial cds |
| Tuhoko virus 1 | GU128080.1 | Tuhoko virus 1, complete genome |
| Tuhoko virus 2 | GU128081.1 | Tuhoko virus 2, complete genome |
| Tuhoko virus 3 | GU128082.1 | Tuhoko virus 3, complete genome |
| Eidolon PV isolate EPMV RC09 214s | HE647822.1 | Eidolon paramyxovirus RC09 partial L gene for RNA-dependent RNA polymerase, isolate EPMV_RC09_214s |
| Eidolon PV isolate EPMV_RC09_222kl | HE647825.1 | Eidolon paramyxovirus RC09 partial L gene for RNA-dependent RNA polymerase, isolate EPMV_RC09_222k |
| Ghana virus | HQ660129.1 | Bat Paramyxovirus Eid_hel/GH-M74a/GHA/2009, complete genom |
| BatPV Eid hel M61a Ghana | HQ660133.1 | Bat Paramyxovirus Eid_hel/GH-M61a/GHA/2009 isolate BatPV/Eid_hel/GH-M61a/GHA/2009 RNA-dependent RNA polymerase (L) gene, partial cds |
| BatPV Eid hel GB1535 Gabon | HQ660141.1 | Bat Paramyxovirus Eid_hel/GB1535/GAB/2005 isolate BatPV/Eid_hel/GB1535/GAB/2005 RNA-dependent RNA polymerase (L) gene, partial cds |
| BatPV Eid hel GB1678 Gabon | HQ660144.1 | Bat Paramyxovirus Eid_hel/GB1678/GAB/2005 isolate BatPV/Eid_hel/GB1678/GAB/2005 RNA-dependent RNA polymerase (L) gene, partial cds |
| BatPV Eid hel clone U44A | JN648059.1 | Eidolon helvum paramyxovirus clone U44A large protein (L) gene, partial cds |
| BatPV Eid hel clone U49B | JN648067.1 | Eidolon helvum paramyxovirus clone U49B large protein (L) gene, partial cds |
| BatPV Eid hel clone U64A | JN648077.1 | Eidolon helvum paramyxovirus clone U64A large protein (L) gene, partial cds |
| BatPV Eid hel clone U66A | JN648078.1 | Eidolon helvum paramyxovirus clone U66A large protein (L) gene, partial cds |
| BatPV Eid hel clone U68G | JN648082.1 | Eidolon helvum paramyxovirus clone U68G large protein (L) gene, partial cds |
| BatPV Eid hel clone U69C | JN648083.1 | Eidolon helvum paramyxovirus clone U69C large protein (L) gene, partial cds |
| BatPV Eid hel clone U69D | JN648084.1 | Eidolon helvum paramyxovirus clone U69D large protein (L) gene, partial cds |
| BatPV Eid hel clone U6B | JN648086.1 | Eidolon helvum paramyxovirus clone U6B large protein (L) gene, partial cds |
| BatPV Eid hel clone U9D | JN648089.1 | Eidolon helvum paramyxovirus clone U9D large protein (L) gene, partial cds |
| BatPV Eid hel clone U6B | JN862562.1 | Eidolon helvum paramyxovirus clone U6B polymerase (L) gene, partial cds |
| Bat PV Eid hel clone U54A | JN862563.1 | Eidolon helvum paramyxovirus clone U54A polymerase (L) gene, partial cds |
| Bat PV Eid hel clone U51A | JN862564.1 | Eidolon helvum paramyxovirus clone U51A polymerase (L) gene, partial cds |
| BatPV Eid hel clone U62A | JN862567.1 | Eidolon helvum paramyxovirus clone U62A polymerase (L) gene, partial cds |
| BatPV Eid hel clone U59A | JN862570.1 | Eidolon helvum paramyxovirus clone U59A polymerase (L) gene, partial cds |
| Bat PV Eid hel clone U54B | JN862571.1 | Eidolon helvum paramyxovirus clone U54B polymerase (L) gene, partial cds |
| Bat PV Eid hel clone U51B | JN862573.1 | Eidolon helvum paramyxovirus clone U51B polymerase (L) gene, partial cds |
| Bat PV Eid hel clone U63A | JN862574.1 | Eidolon helvum paramyxovirus clone U63A polymerase (L) gene, partial cds |
| Bat PV Eid hel clone U64A | JN862575.1 | Eidolon helvum paramyxovirus clone U64A polymerase (L) gene, partial cds |
| BatPV Eid hel clone U42B | JN862577.1 | Eidolon helvum paramyxovirus clone U42B polymerase (L) gene, partial cds |
| Bat PV Eid hel clone U61A | JN862578.1 | Eidolon helvum paramyxovirus clone U61A polymerase (L) gene, partial cds |
| Bat PV Eid hel clone U59B | JN862579.1 | Eidolon helvum paramyxovirus clone U59B polymerase (L) gene, partial cds |
| Bat PV Eid hel clone U50B | JN862580.1 | Eidolon helvum paramyxovirus clone U50B polymerase (L) gene, partial cds |
| Bat PV Eid hel clone U58B | JN862583.1 | Eidolon helvum paramyxovirus clone U58B polymerase (L) gene, partial cds |
| BatPV Eid hel clone U68B | JN862590.1 | Eidolon helvum paramyxovirus clone U68B polymerase (L) gene, partial cds |
| Bat PV Eid hel clone U32A | JN862594.1 | Eidolon helvum paramyxovirus clone U32A polymerase (L) gene, partial cds |
| Achimota pararubulavirus 1 | JX051319.1 | Achimota virus 1, complete genome |
| Mojiang virus | KF278639.1 | Mojiang virus isolate Tongguan1, complete genome |
| Hendra virus Horse | MN062017.1 | Hendra henipavirus strain HeV/Australia/1994/Horse18, complete genome |
| Achimota pararubulavirus 3 | MT062420.1 | Achimota pararubulavirus 3 isolate U72, complete genome |
| Sendai virus | NC_001552.1 | Sendai virus genomic RNA, antisense, complete sequence |
| Human parainfluenza virus 3 | NC_001796.2 | Human parainfluenza virus 3, complete genome |
| Mumps virus | NC_002200.1 | Mumps virus, complete genome |
| Nipah virus Malaysia | NC_002728.1 | Nipah virus, complete genome |
| Human rubulavirus 2 | NC_003443.1 | Human rubulavirus 2, complete genome |
| Human parainfluenza virus 1 | NC_003461.1 | Human parainfluenza virus 1, complete genome |
| Tioman virus | NC_004074.1 | Tioman virus, complete genome |
| Mossman virus | NC_005339.1 | Mossman virus, complete genome |
| Rinderpest virus | NC_006296.2 | Rinderpest virus (strain Kabete O), complete genome |
| Peste des petits ruminants virus | NC_006383.2 | Peste des petits ruminants virus complete genome |
| Simian virus 41 | NC_006428.1 | Simian virus 41, complete genome |
| Parainfluenza virus 5 | NC_006430.1 | Parainfluenza virus 5, complete genome |
| Beilong virus | NC_007803.1 | Beilong virus, complete genome |
| Mapuera virus | NC_009489.1 | Mapuera virus, complete genome |
| Porcine rubulavirus | NC_009640.1 | Porcine rubulavirus, complete genome |
| Nariva virus | NC_017937.1 | Nariva virus, complete genome |
| Human parainfluenza virus 4 | NC_021928.1 | Human parainfluenza virus 4a viral cRNA, complete genome, strain: M-25 |
| Sosuga virus | NC_025343.1 | Sosuga virus isolate 2012, complete genome |
| Cedar virus | NC_025351.1 | Cedar virus isolate CG1a, complete genome |
| Achimota pararubulavirus 2 | NC_025404.1 | Achimota virus 2, complete genome |
| Bat mumps orthorubulavirus | NC_038271.1 | Bat Paramyxovirus Epo_spe/AR1/DRC/2009, complete genome |
| Menangle virus | NC_039197.1 | Menangle virus isolate Australia/bat/2009/Cedar Grove, complete genome |

**Table S3. Nucleotide sequences detected using PCR.**

Abbreviations: P = 530 bp fragment obtained with the pan-*Paramyxovirinae* RT-PCR, R = 439 bp fragment obtained with the *Respiro-Morbilli-Henipavirus* RT-PCR

| Sequence Name | Genbank Accession ID: description | Nucleotide Sequence |
| --- | --- | --- |
| Z15-U12R | MZ393364  RMH Bat Eid hel/GH/2015/U12R | ATATCGAGACAGACATGGTGGAATTTGGCCAGAATGTTATCTCCCCAACCACGCTTCTCAAATAATTAAGAGTAAAAAGATGAATGGGGAAGGGTTATCTATAGAGGATTGTGTCGAAAACTGGCGATCATTTTGTGGATTTAAATTCGGGTGTTTTATGTCTTTAACTTTAGATGAGGATCTGAGCATGTACATGAAAGACAAAGCTTTGTCTCCCATTAAATCACAATGGGACTCTGTTTACCCTAATGCCAACATGAAATACACGCCAAAGCCTAGTACTACATCCAGAAGATTGGTAGACGTATTTATCAATGATGCTGAGTTTGAACCGTCAAATTTAATAAACTATGTAATCAACGGTGACTATTTGGTGGATGAAGATTTCAACATTTCTTATAGTCTAAAAGAAAAAGAAGTCAAAGAAGTTGGGAGACTG |
| Z15-U17R | MZ393365  RMH Bat Eid hel/GH/2015/U17R | TTATAGAGACAGGCATGGAGGTGCCTGGCCTCCCGTCAAGTTTCCAGAGCACTGCTCAAAAAGCATACTGAGACTCAAAAATTCTGGCGAATCTATTACTATAGAAGATTGTGTTAAAAACTGGGAATCATTTTGCGGCATTGAATTCGGTTGTTTTATGGACTTAAACCTGGACACTGATCTAAGCATGTATATGAAAGATAAGGCTTTGTCACCTATCAAAGAAGAATGGGATAGTGTATACCCTAAAGAGGTATTGTCATATAAACCTCCCAAATTAACAGAGCCCAGAAGACTAGTAGATGTATTTGTCAATGACCCAGATTTTGATCCTTATGAAATGATTCAGTATGTCTTGACAGGAGCATACCTAACAGACCCGAAGTTCAATGTCTCGTATAGTTTGAAAGAGAAAGAAACTAAGCAAGCAGGGAGATTA |
| Z15-U27R | MZ393366  RMH Bat Eid hel/GH/2015/U27R | TTTTAGAGATCAACATGGAGGTGCTTGGCCTCCGGTAGTTTTACCAAATCATGCAGACCCTAGGATAAAAAGACTTAAAAACAATGATGAAGCAATCTCTATTGAGGATGCCATTAAATACTGGAAATCATTTGTAGGGTTCCACTTTAAGACATTTATGCCTTTAAACTTGGACAAAGATTTAAGTATGTATATGAAAGACAAGGCTTTATCACCAATCAAATCAGAGTGGGATTCTGTATACCCAAAAGATAATATGCTTTATGTTCCTCCGAAAAATACAACATCAAGAAGATTAGTTGATGTATTCCTTGATGATTCCGATTTTGATCCTATGAATTTGATCAATTATGTTATATCTGGTGATTATTTGAAAGATCCTGATTTCAACATATCTTATAGTTTAAAGGAAAAAGAGACAAAACAAGTTGGTCGGTTA |
| Z15-U78R | MZ393367  RMH Bat Eid hel/GH/2015/U78R | GTATAGAGATAGACATGGAGGTACTTGGCCACCCTGTAATCTTCCTCCCCATTGTTCACCTGCCATTCGAAAAAAACAACTAAATGCAGAATCAGTGTCAATAGAGGACTGTATTCAAAATTGGCAATCATTTTGTGGGTTCAGTTTCAAGTGTTTTATGCCATTATCATTAGATTCAGATCTTAGTATGTACATGAAGGACAAAGCATTATCACCTAATAAATCAGAATGGGACTCTGTCTATCCCGCAACAAACACCAAATACACACCACCTAGATCTCAAACATCTAGGAGATTAGTTGATAGGTTCATTGAAGATGATGAGTTTGAACCATCTGACATGATCAATTATGTCCTTTCAGGTGAGTATCTCAGTGATGATACATTTAATATCTCATACAGTCTAAAAGAGAAAGAAGTCAAAGAAGTCGGACGATTA |
| Z15-U86R | MZ393368  RMH Bat Eid hel/GH/2015/U86R | CTATCGAGATCAACATGGAGGTGCCTGGCCTCCTGTTCACTTCAAGGACCATATAAGCAAAAAGATCAAGAGGTTAATGATTAATAATGAGGCAATATCTGTAGAAGATGCAGTTCTGAACTGGAAATCCTTTATAGGTTTCAAATTTGGTATATTTATGCCACTTGATCTGGATAGTGATTTGAGCATGTATATGAAAGATAAGGCATTATCTCCATTGAACAAAGATTGGGATTCCGTTTATCCTAAGGAAAATTTGAAATACACACCCCCGAAAAGCCAAGTCTCAAGACGTCTCGTGGATGTATTTTTAGAAGATGAACAATTTGACCCTGTCAATTTGATTAACTATGTTCTTAGTGGAGAATACTTACAAGACAAGAATTTCAACATCTCTTATAGTTTAAAAGAAAAGGAGACAAAACAAGCTGGTCGACTA |
| Z15-U115R | MZ393369  RMH Bat Eid hel/GH/2015/U115R | ATTCCGAGATCAACATGGAGGTGCTTGGCCCCCTATCACATTCCCAGAGCATGTTGATAAACATATTAAAAGACTACAAATCAATAGCGAAGCAATATCTGTAGAAGATGCTATACTAAATTGGAGATCTTTTGTTGGGTGCCATTTCAAGCAATTTATGCCTCTCGATTTAGATAAGGATCTTAGTATGTACATGAAAGATAAAGCATTATCCCCAATTAAAAAGGAATGGGATTCAGTATATCCTAGGGACAGTATGTATTATTGTCCTCCCAAATCAACGACTTCACGCAGATTGGTTGAGGTATTCTTAGAAGATTCTGAATTCGATCCAGCAGAACTAATGGAGTATGTATTGTCTGGCGATTATCTTAATGACCAAGATTTTAATATAAGTTACAGTCTCAAAGAGAAAGAAACAAAACAAGTGGGTAGACTT |
| Z15-U17P | MZ393370  PAR Bat Eid hel/GH/2015/U17P | TGAATCAATAGCGATCACACAGAAAGTTCATCCAAATTTACCATACAGGGTCAAAAAGGAAATATGTGCAAAGCAAGCACAAATATATTTCAAGAGATTAAGGGAAAATTTAAGATCATTAGGCCATGATCTCAAGGCAACTGAAACAATTATCAGCACACACCTCTTTGTATACTCCAAGAAAATACATTATGATGGGGCAGTACTTTCCCAAGCACTTAAATCCATATCTAGGTGTTGTTTCTGGTCAGAGACATTAGTGGATGAAACTAGGTCAGCATGCAGTAATATCAGCACTGCTATAGCTAAAAGCATAGAGAATGGTCTATCTAAAGATGTAGGCTACTGCTTGAACTTTTTAAAAGTTTTACAACAATTACTGATTGCGACTGAATTCGGAATTAATGATACGTTGACACCAGACGTTACCAGGCCGATAACTGAAAACCCGGAGTGGTTAATTACAGCGGCATTAATCCCAGCACCAATTGGAGGATACAACTATTTGAATATGTCTAGAATATACGTTA |
| Z15-U27P | MZ393371  PAR Bat Eid hel/GH/2015/U27P | CCAATCAATAGCAATCACAAGGAGAGTTCATCCCTCATTAAGTTTCAAAGCCAAAAAAGATATTGCTGCAGATACAACACAAAAATACTTCTTAAGACTTCGGGAGAATCTAAGAGCTTTAGGTCATGATCTTAAAGCAAACGAAACAATTATGAGCACAGCATTTTTTGTATATTCAAAGAAGATATATTATGATGGACTTGTATTGTCACAGGCACTTAAATCTATTGCAAGATGTTGCTTTTGGTCTGAAACACTAGTGGATGAATCACGATCAGCATGTTCAAACATATCAACTACCATTGCCAAATCTATTGAAAACGGATTATCGAAGAAAGCAGGTTACTGCCTTAATCTACTAAAAACTCTTCAACAATTATACATTACCCTGGGATTCAATATTAATGAGACATTAACAGAGGATGTGACTAAATCTATGATCCAAAATTATAGCTGGTTGATATCAGCTTCATTACTTCCAGCTCCTTTAGGAGGATTCAATTATCTTAATATGTCCCGTGTGTTTGTAA |
| Z15-U111P | MZ393372  PAR Bat Eid hel/GH/2015/U111P | TCAAGCTATCGCAATTACTGCAAAGGTGCCTCGTGCAGCTCCGTACCAAGAGAAGAAGAGAATAGCATTTGAGAATAGCAAATTGTTCATTGAGCGTCTTAGAGCAAATAATAAAGGATTAGGACATCATCTCAAAGAGCAAGAGACAATTTTGAGTTCCGAGTTCTTTGTTTACAGCAAGCGCATCTTTTTTCGCGGAAGGATTTTAAATCAGGCATTAAAAAATGTTAGCAAACTAAACCTAATTGCAGATGTTCTAAGTGAATGCAGTCAGACTTCATGTGCTAATTTGACCACAACAGTGATGAGACTCACAGAAAATGGGGTCGAGAAAGATATTTGTTACTTCCTCAGTATTTATCTCTCTATTAAGCAATTGGTCTATGATCTGATGTTCCCGATGACTACATTCATTGAAGATGCTATTACTTCTTTATATCTCAACCACCCTATCTTGATTGCTAGACTATGTGTGTTACCTTCACAGCTTGGCGGGCTCAATAATTACTCAATCAGCAGATTATTTAACA |
